# Supplementary material for: Immunogenicity of prime-boost protein subunit vaccine strategies against SARS-CoV-2 in mice and macaques
Source: PubMed Central journal article supplement (PMC7930087; doi:10.1038/s41467-021-21665-8), 2021-03-03
Supplement: 41467_2021_21665_MOESM1_ESM.pdf [file 41467_2021_21665_MOESM1_ESM.pdf]

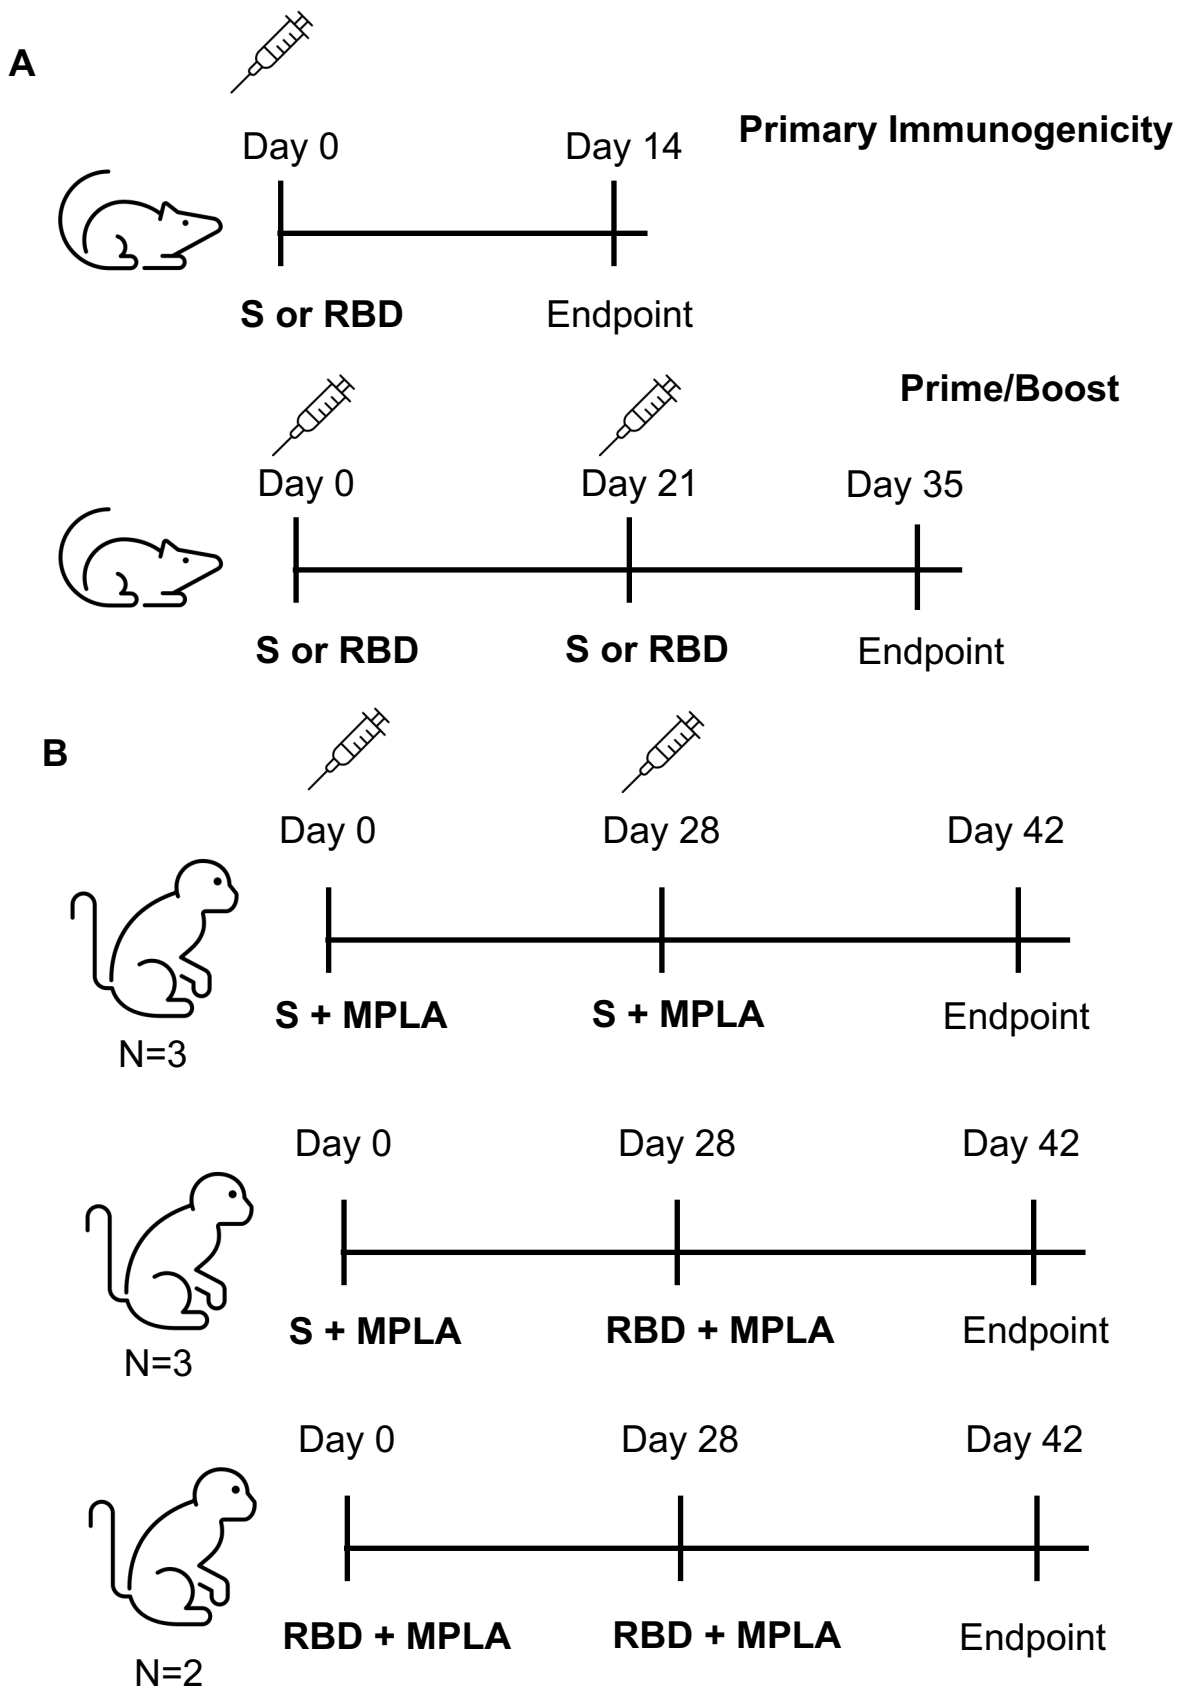

**Supplemental Figure 1. Animal trial vaccination schedule.** (A) Mice were immunised with recombinant S or RBD proteins for assessment of either primary immunogenicity or a prime/boost regimen. (B) Three groups of pigtail macaques were vaccinated with combinations of S or RBD antigens in a prime/boost regimen, with peripheral blood and lymph node samples collected at day 42.

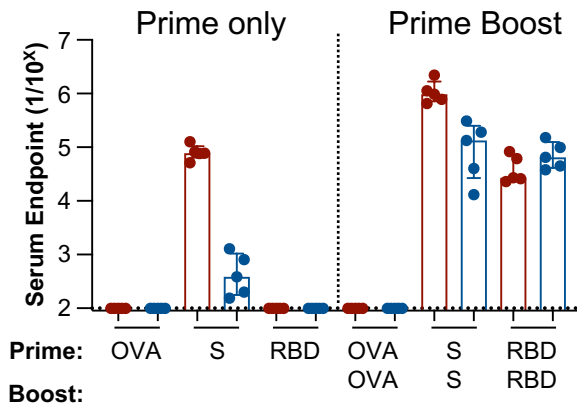

**Supplementary Figure 2. Comparison of serological responses to S and RBD immunogens at day 28.** Mice were serially immunised intramuscularly at a 21-day interval with S, RBD or OVA proteins and immune responses assessed at 28 days post-prime or post-boost (N=5 per group). Reciprocal serum endpoint dilutions of S- (red) or RBD-specific (blue) IgG were measured by ELISA. Error bars indicate interquartile range.

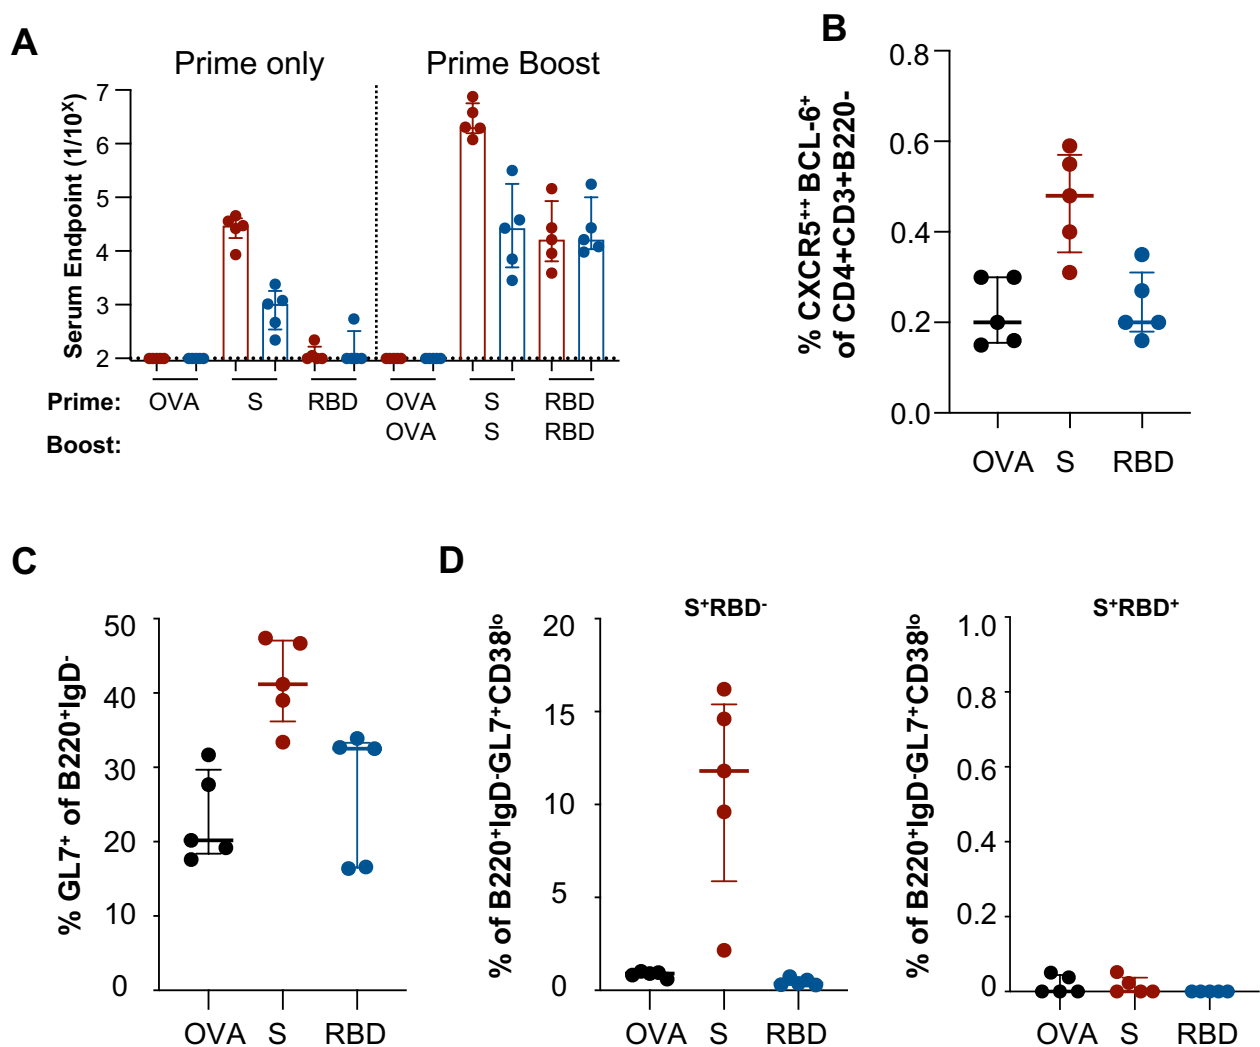

**Supplemental Figure 3. Primary immunogenicity of SARS-CoV-2 subunit proteins formulated with MPLA.** Mice were immunised intramuscularly at a 21-day interval with S (red), RBD (blue) or OVA (black) immunogens formulated with MPLA adjuvant and immune responses assessed 14 days post-primary and/or secondary immunisation (n = 5). (A) Reciprocal serum endpoint dilutions of S- (red) or RBD-specific (blue) were measured by ELISA. Dotted lines denote the detection cut off (1:100 dilution). Mice immunised once (prime only) were assessed for (B) frequency of TFH cells (CXCR5<sup>++</sup>BCL-6<sup>+</sup>CD4<sup>+</sup>CD3<sup>+</sup>B220<sup>-</sup>), (C) germinal centre activity in draining lymph node by GL7 expression in B220<sup>+</sup>IgD<sup>-</sup> B cells and (D) frequency of germinal centre B cells (B220<sup>+</sup>IgD<sup>-</sup>GL7<sup>+</sup>CD38<sup>lo</sup>) specific for Spike (S<sup>+</sup>RBD<sup>-</sup>) or RBD (S<sup>+</sup>RBD<sup>+</sup>) probes. Data is presented as median ± IQR.

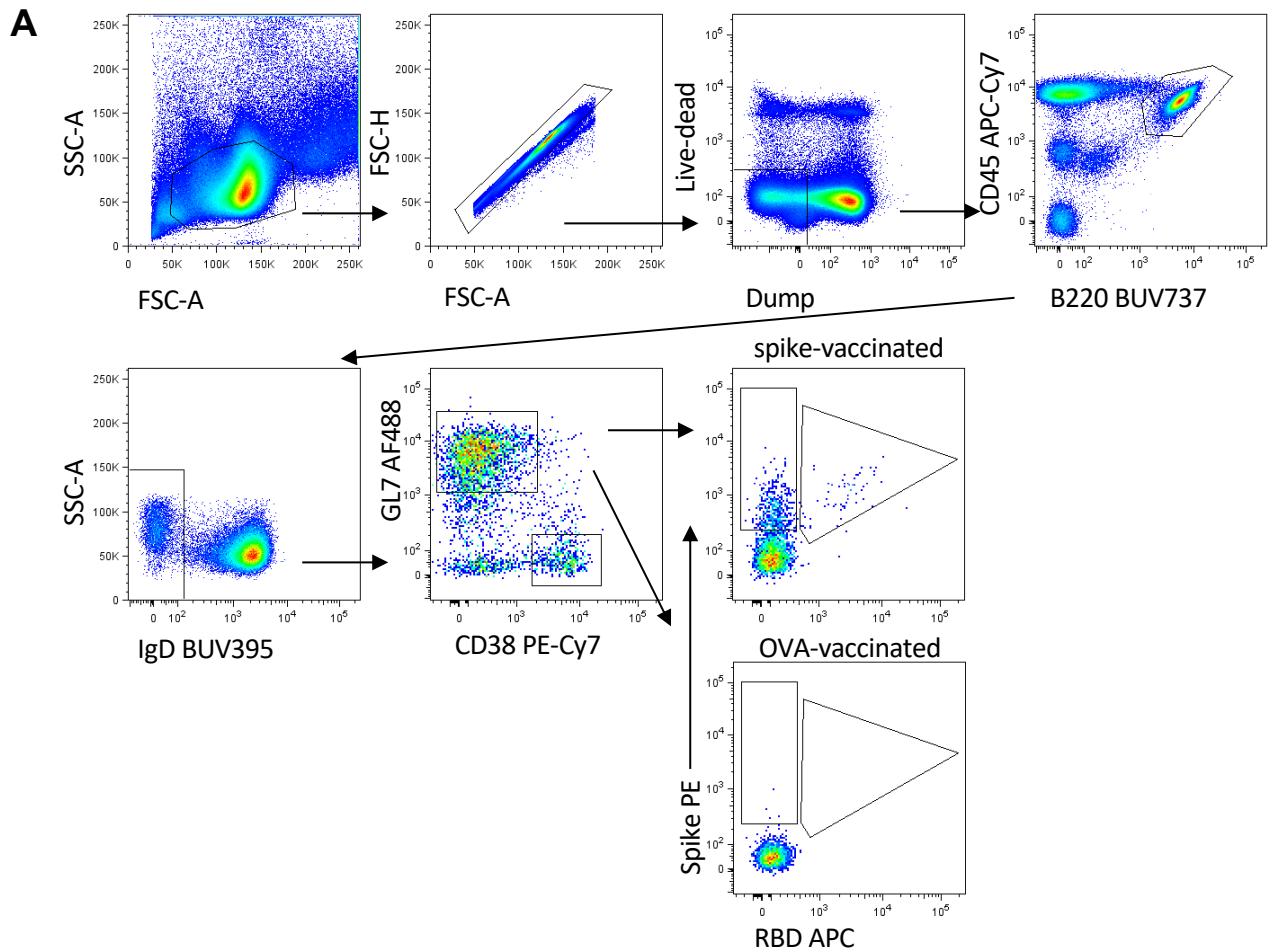

**Supplemental Figure 4. Identification of bulk and antigen-specific mouse germinal centre B cells.** Lymphocytes were identified by FSC-A vs SSC-A gating, followed by doublet exclusion (FSC-A vs FSC-H). Live and CD3-F4/80-streptavidin- (dump channel) cells were gated and CD45<sup>+</sup>B220<sup>+</sup>IgD<sup>-</sup> B cells identified. Germinal centre (GL7<sup>+</sup>CD38<sup>lo</sup>) B cells were then assessed for binding to SARS-CoV-2 spike (S) and/or SARS-CoV-2 RBD probes. Gating strategy corresponds to data presented in Figure 1C-D and Figure 2D-E.

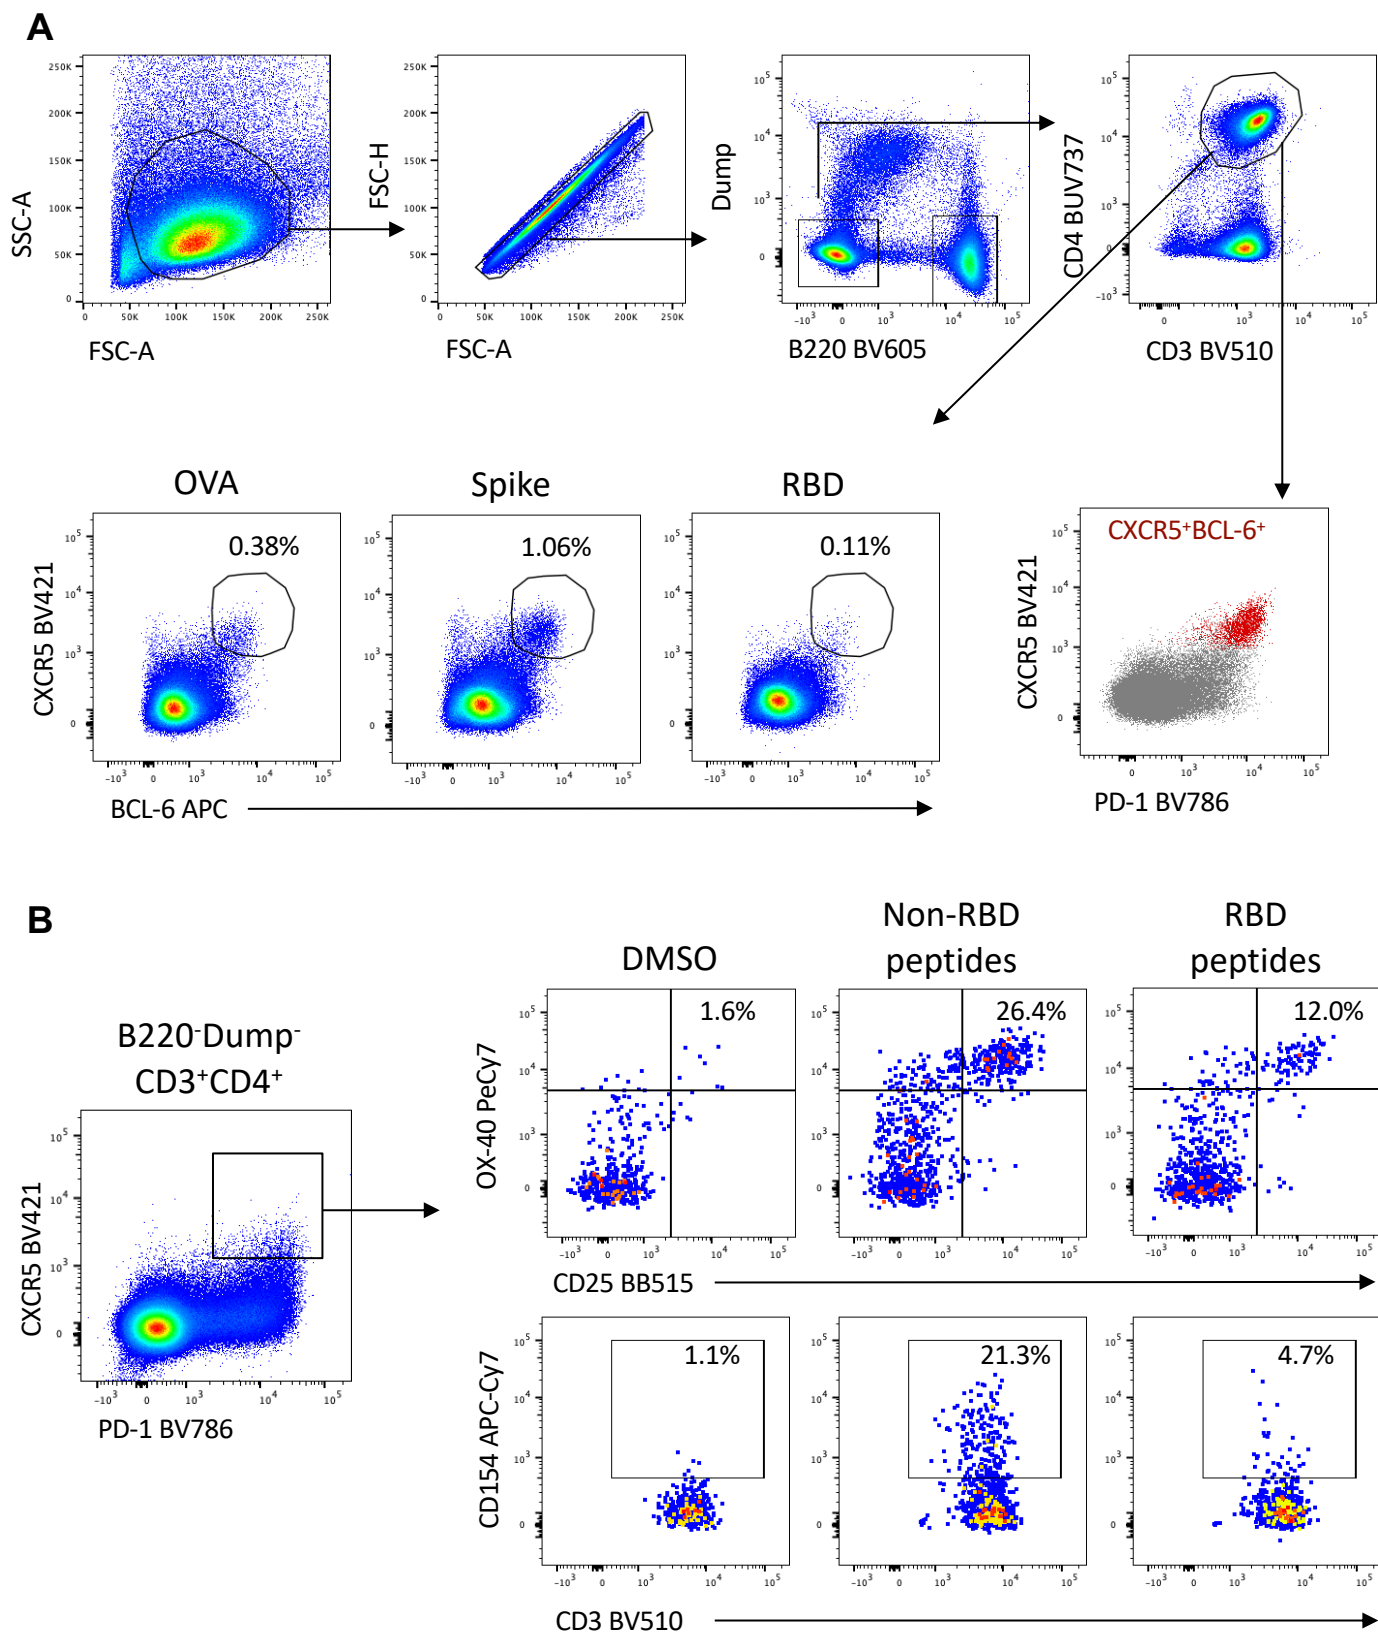

**Supplemental Figure 5. Identification of bulk and antigen-specific mouse TFH cells. (A)** Gating strategy for ex vivo identification of lymph node TFH cells, based on BCL-6 and CXCR5 expression. Comparison of bulk CD4<sup>+</sup> (grey) and TFH cells (red) confirms the PD-1<sup>hi</sup> phenotype of the BCL-6<sup>+</sup>CXCR5<sup>hi</sup> population. Gating corresponds to data presented in Figure 1E and 2F. **(B)** Identification of S-specific TFH (OX-40<sup>+</sup>CD25<sup>+</sup> or CD154<sup>+</sup>) following peptide pool stimulation of lymph node suspensions from S-vaccinated animals (plots represent pooled lymph nodes from 3 animals). Gating corresponds to data presented in Figure 1F.

**A**Gate: CD3<sup>+</sup>CD4<sup>+</sup>CXCR5<sup>-</sup>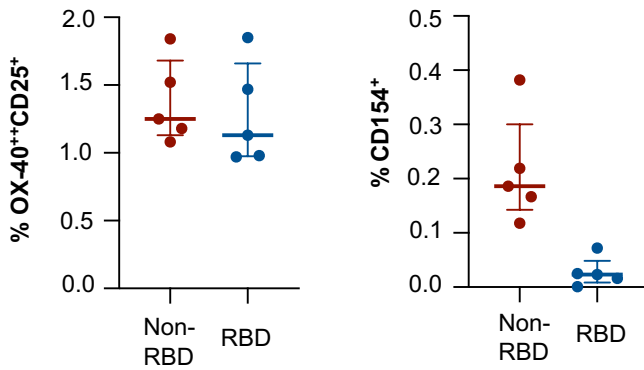**B**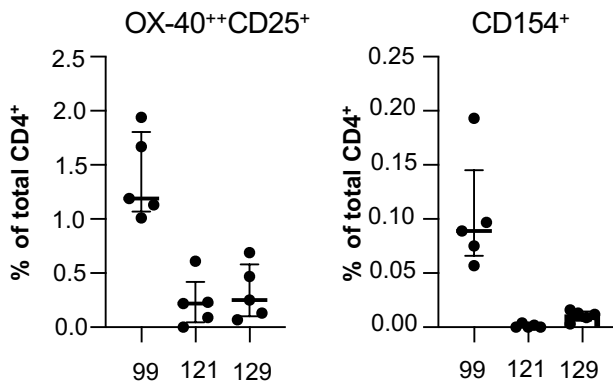**C**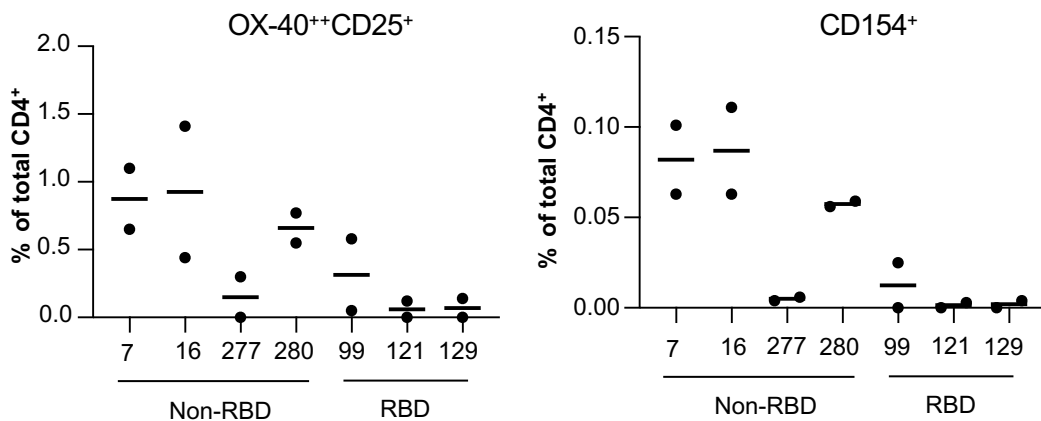**Supplemental Figure 6. SARS-CoV-2 RBD immunogenic T cell epitopes. (A)**

Quantification of OX-40<sup>++</sup>CD25<sup>+</sup> or CD154<sup>+</sup> CD4<sup>+</sup> T cells with specificity for non-RBD (red) or RBD-derived (blue) epitopes following primary vaccination with S protein (n=5 mice). **(B)** Screening of RBD-derived 15-mer peptides identified 3 T cell epitopes recognized by C57BL/6 mice. Graphs indicate the frequency of OX-40<sup>++</sup>CD25<sup>+</sup> or CD154<sup>+</sup> CD4<sup>+</sup> cells following in vitro peptide re-stimulation of lymph node suspensions from RBD-vaccinated mice (n=5 individual mice). **(C)** Screening of non-RBD peptides identified multiple T cell epitopes immunogenic in C57BL/6 mice, including peptides 7, 16, 277 and 280. Graphs indicate the frequency of peptide-specific CD4<sup>+</sup> T cells in pooled lymph node suspensions of S-vaccinated mice (each data point represents a pool of 5 mice). Data is presented as median ± IQR.

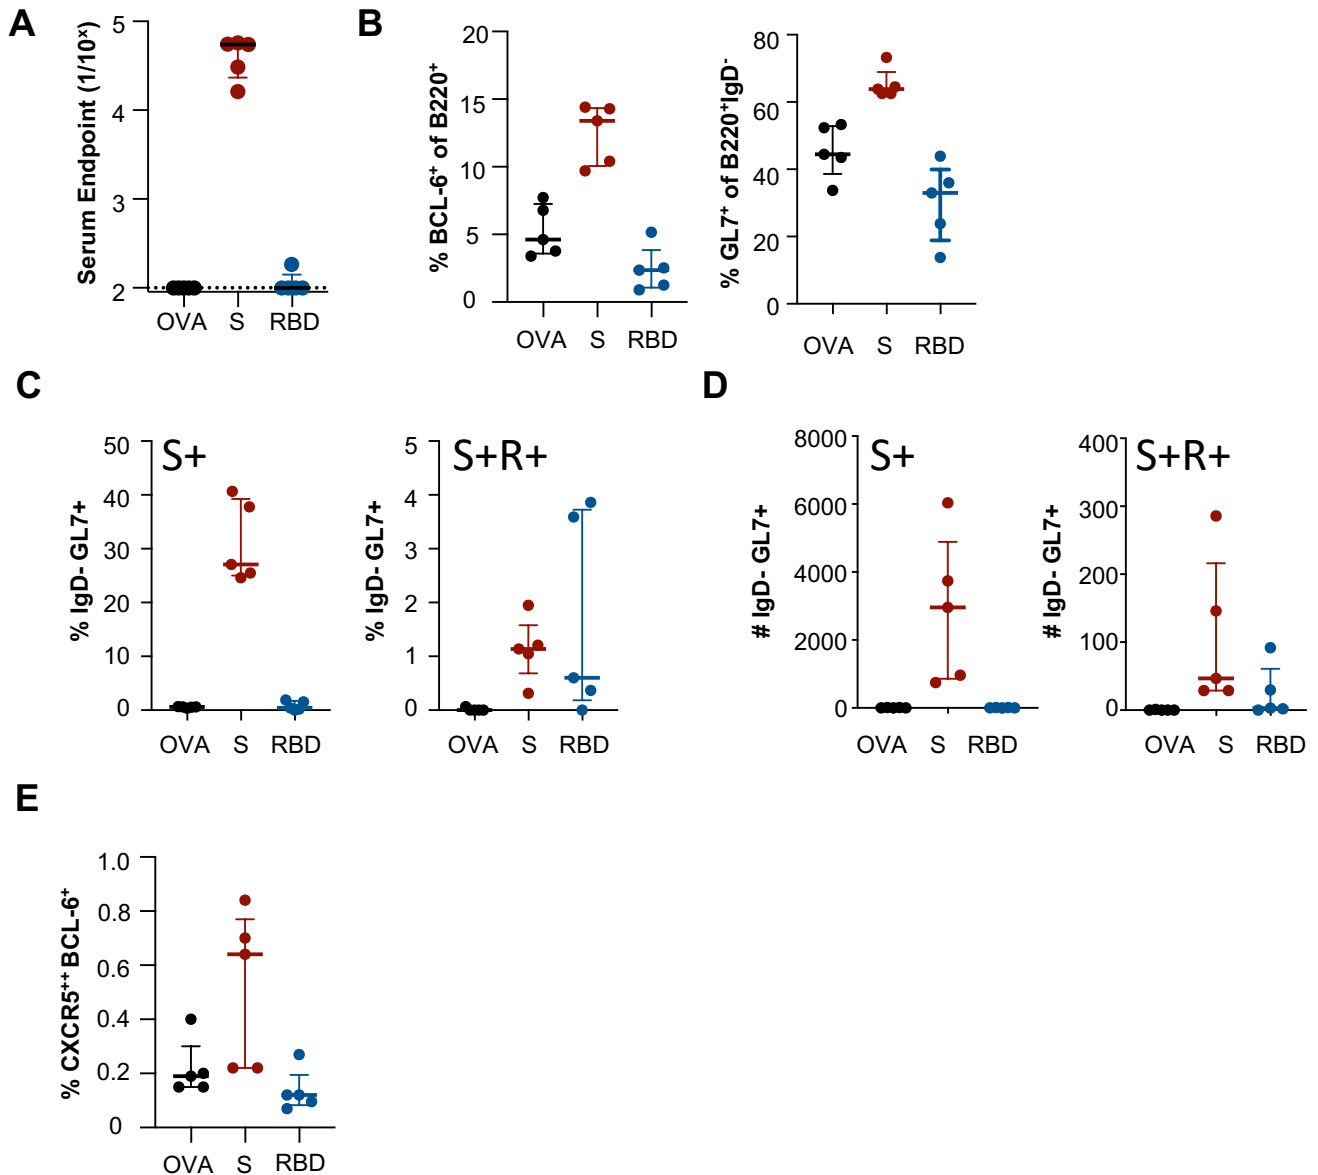

**Supplemental Figure 7. Primary immunogenicity of SARS-CoV-2 subunit proteins in BALB/c mice.** Mice were immunised intramuscularly with S, RBD or OVA immunogens and immune responses assessed 14 days post-immunisation (n = 5). **(A)** Reciprocal serum endpoint dilutions of S- (red), RBD- (blue) or OVA-specific IgG (black) were measured by ELISA. Dotted lines denote the detection cut off (1:100 dilution). **(B)** Draining lymph node germinal centre activity assessed by BCL-6 expression in B220<sup>+</sup> B cells or GL7 expression in B220<sup>+</sup>IgD<sup>-</sup> B cells. **(C)** Frequency and **(D)** absolute counts of germinal centre B cells (B220<sup>+</sup>IgD<sup>-</sup>GL7<sup>+</sup>CD38<sup>lo</sup>) specific for spike (S<sup>+</sup>RBD<sup>-</sup>) or RBD (S<sup>+</sup>RBD<sup>+</sup>) probes. **(E)** Frequency of TFH cells (CXCR5<sup>++</sup>BCL-6<sup>+</sup>CD4<sup>+</sup>CD3<sup>+</sup>B220<sup>-</sup>). Data is presented as median ± IQR.

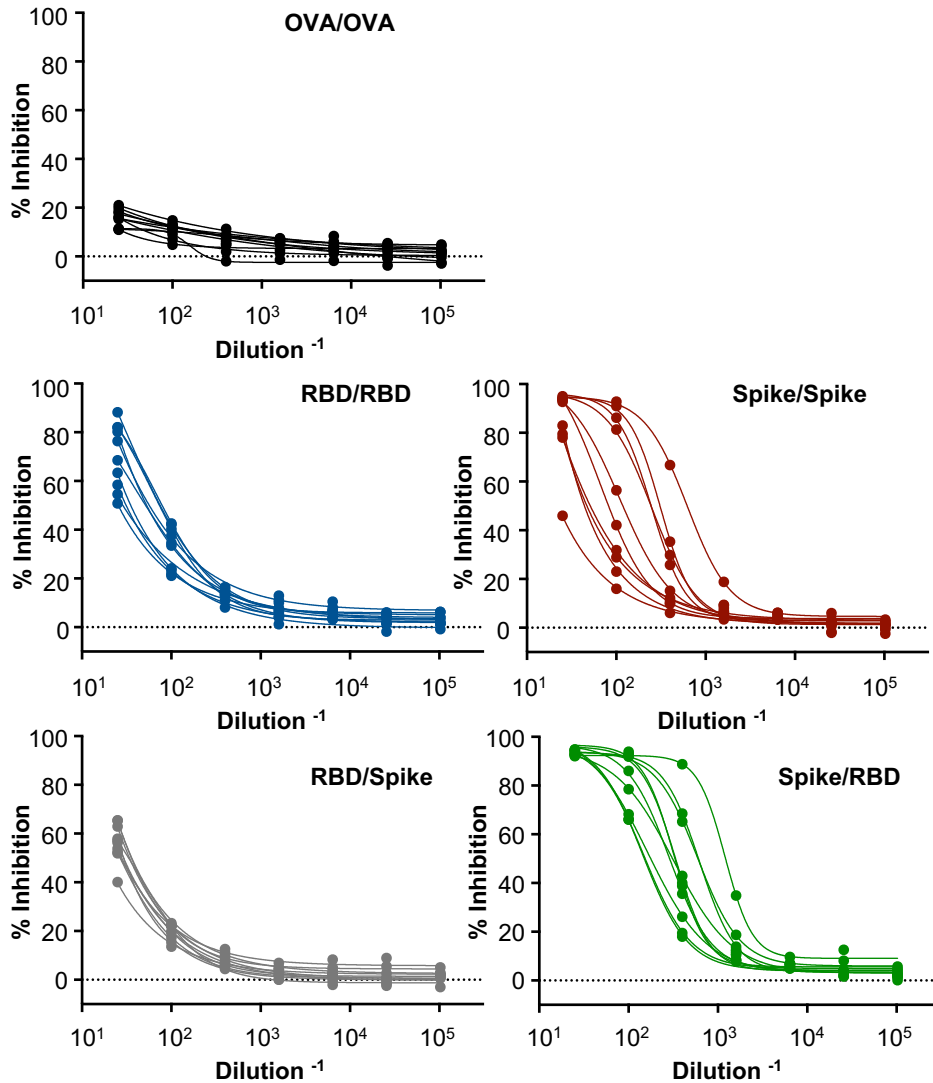

**Supplemental Figure 8. Inhibition of ACE2-RBD engagement by serum antibodies in immunised C57BL/6 mice.** Mice were serially immunised intramuscularly at a 21-day interval with S, RBD or OVA proteins and immune responses assessed 14 days post-boost. The capacity for serum antibodies from immunised mice (n = 10 per group) to inhibit the interaction of recombinant SARS-CoV-2 RBD and human ACE2 was assessed by ELISA.



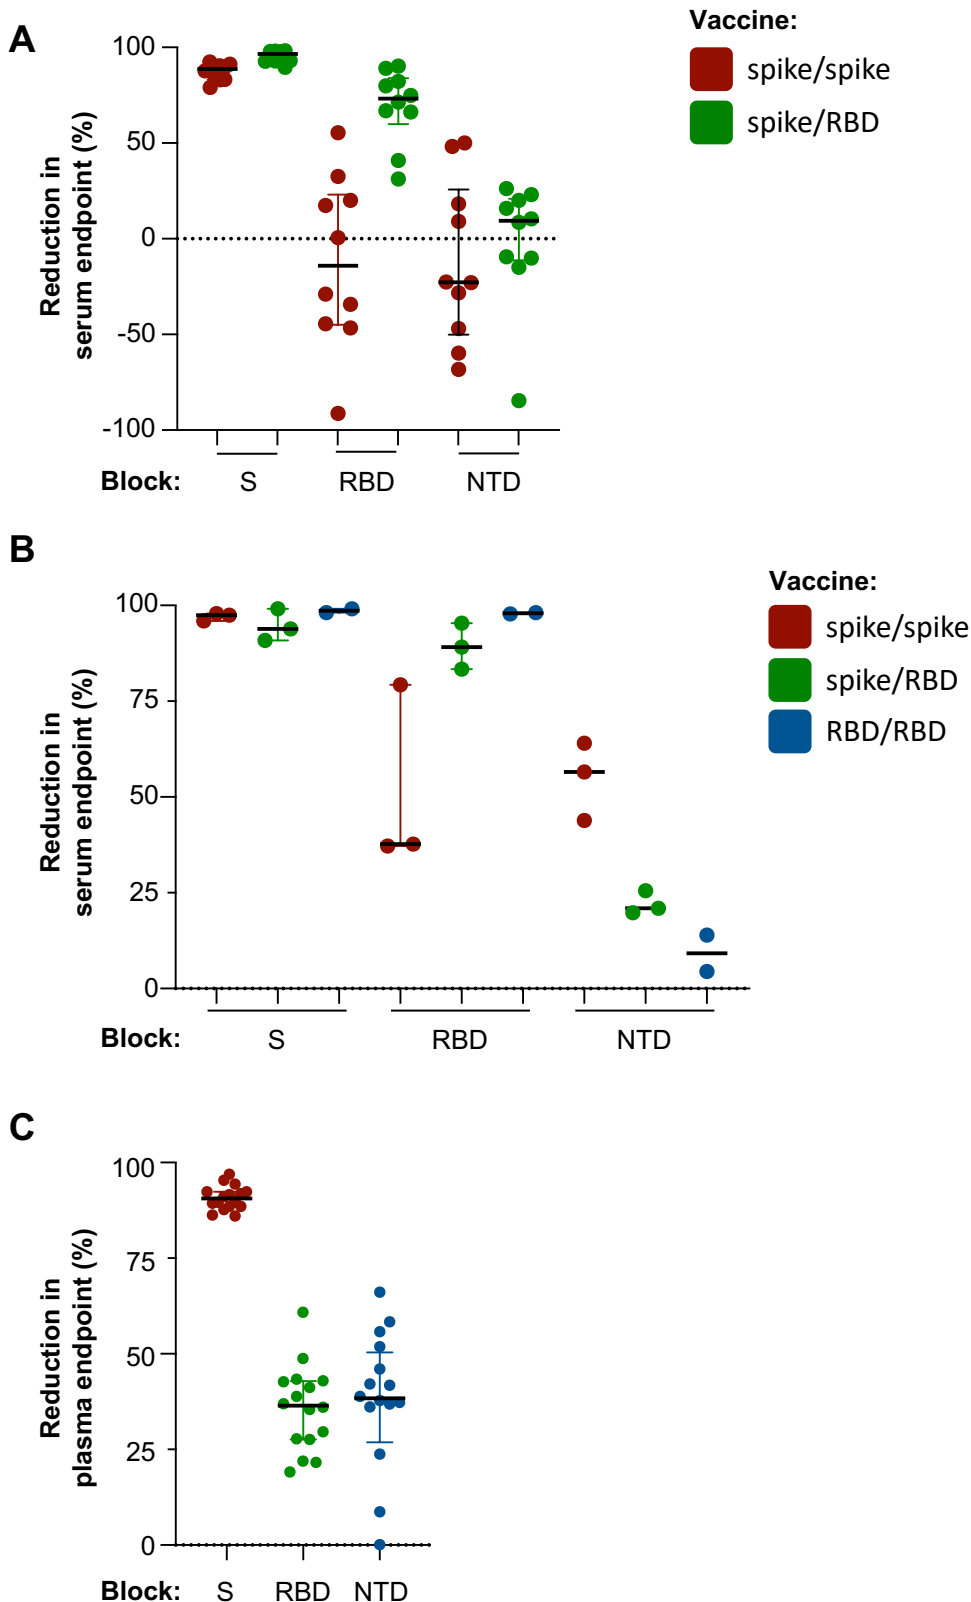

### Supplemental Figure 9. Indicative specificity mapping of S-specific antibody responses

The relative proportion of RBD or NTD reactivity in the S-specific antibody response in immunised (A) mice (N=10) and (B) non-human primates (N=3 spike/spike or spike/RBD; N=2 RBD/RBD), or (C) a random selection of convalescent COVID-19 subjects (N=16), was assessed using a blocking ELISA format. Percentage reductions in serum or plasma endpoint dilutions were calculated after blocking with S, RBD or NTD proteins and calculated relative to a BSA blocked control.

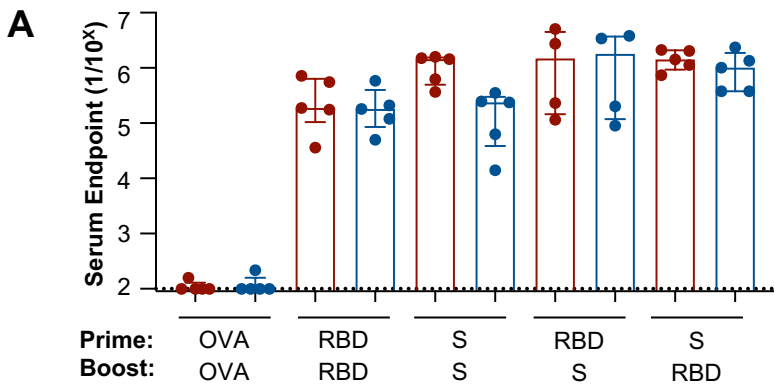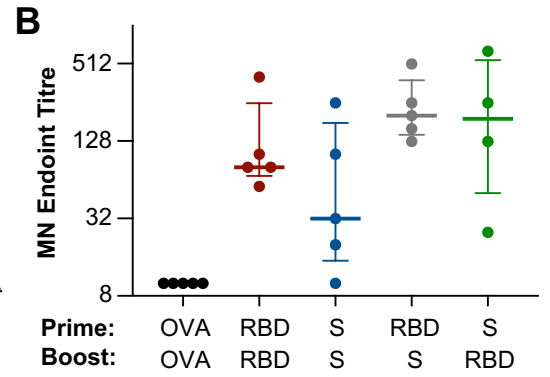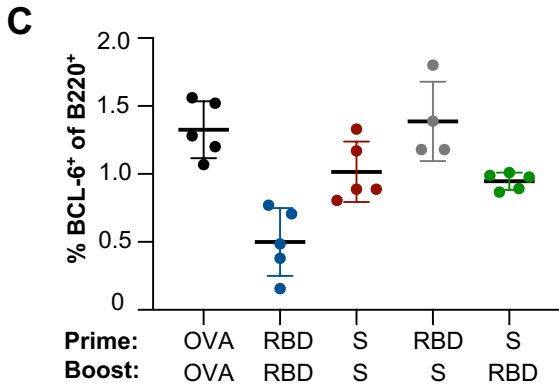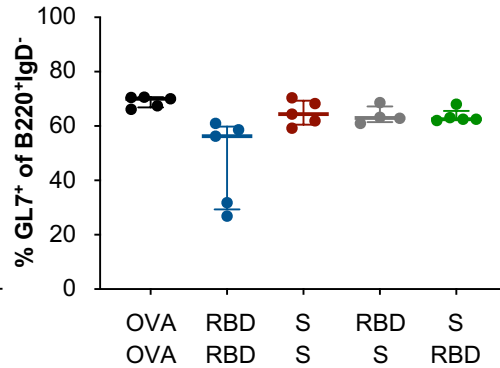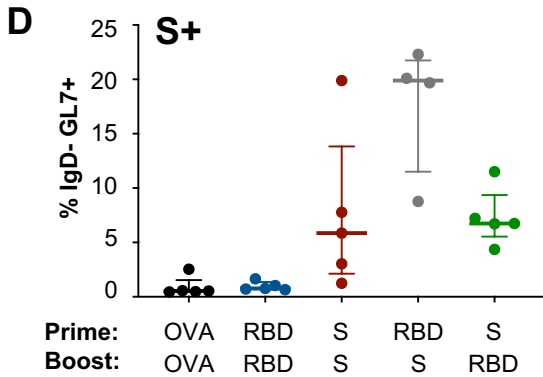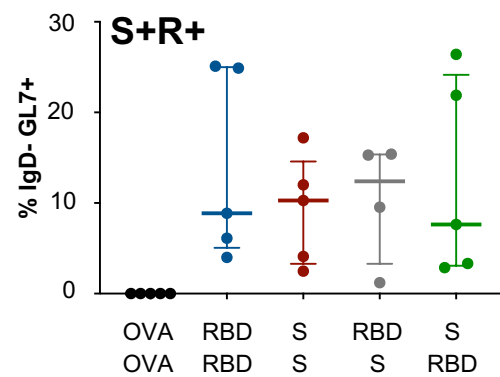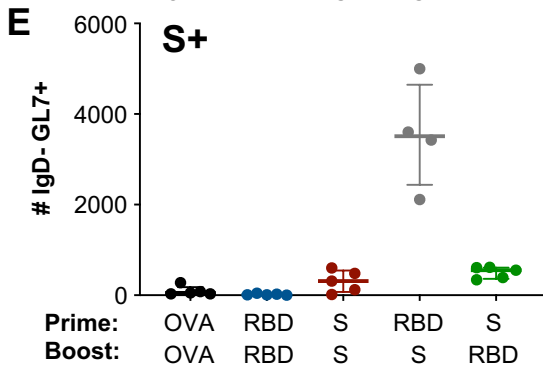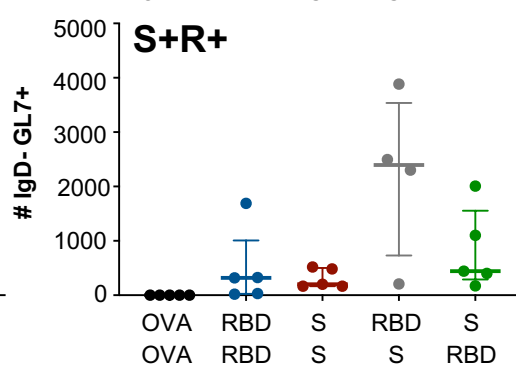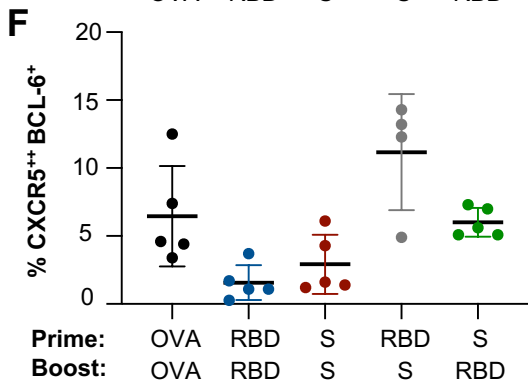

**Supplemental Figure 10. Prime-boost immunisation of SARS-CoV-2 subunit proteins in BALB/c mice.** Mice were serially immunised intramuscularly at a 21-day interval with S, RBD or OVA proteins (S/S red, RBD/RBD blue, OVA/OVA black, RBD/S grey, S/RBD green) and immune responses assessed 14 days post-boost (n = 5, except group RBD-spike n = 4). **(A)** Reciprocal serum endpoint dilutions of S- (red) or RBD-specific (blue) were measured by ELISA. Dotted lines denote the detection cut off (1:100 dilution). **(B)** Neutralisation activity in the serum was assessed using a microneutralisation assay. **(C)** Draining lymph node germinal centre activity assessed by BCL-6 expression in B220<sup>+</sup> B cells or GL7 expression in B220<sup>+</sup>IgD<sup>-</sup> B cells. **(D)** Frequency and **(E)** absolute counts of of germinal centre B cells (B220<sup>+</sup>IgD<sup>-</sup>GL7<sup>+</sup>CD38<sup>lo</sup>) specific for spike (S<sup>+</sup>RBD<sup>-</sup>) or RBD (S<sup>+</sup>RBD<sup>+</sup>) probes. **(F)** Frequency of TFH cells (CXCR5<sup>++</sup>BCL-6<sup>+</sup>CD4<sup>+</sup>CD3<sup>+</sup>B220<sup>-</sup>). Data is presented as median ± IQR.

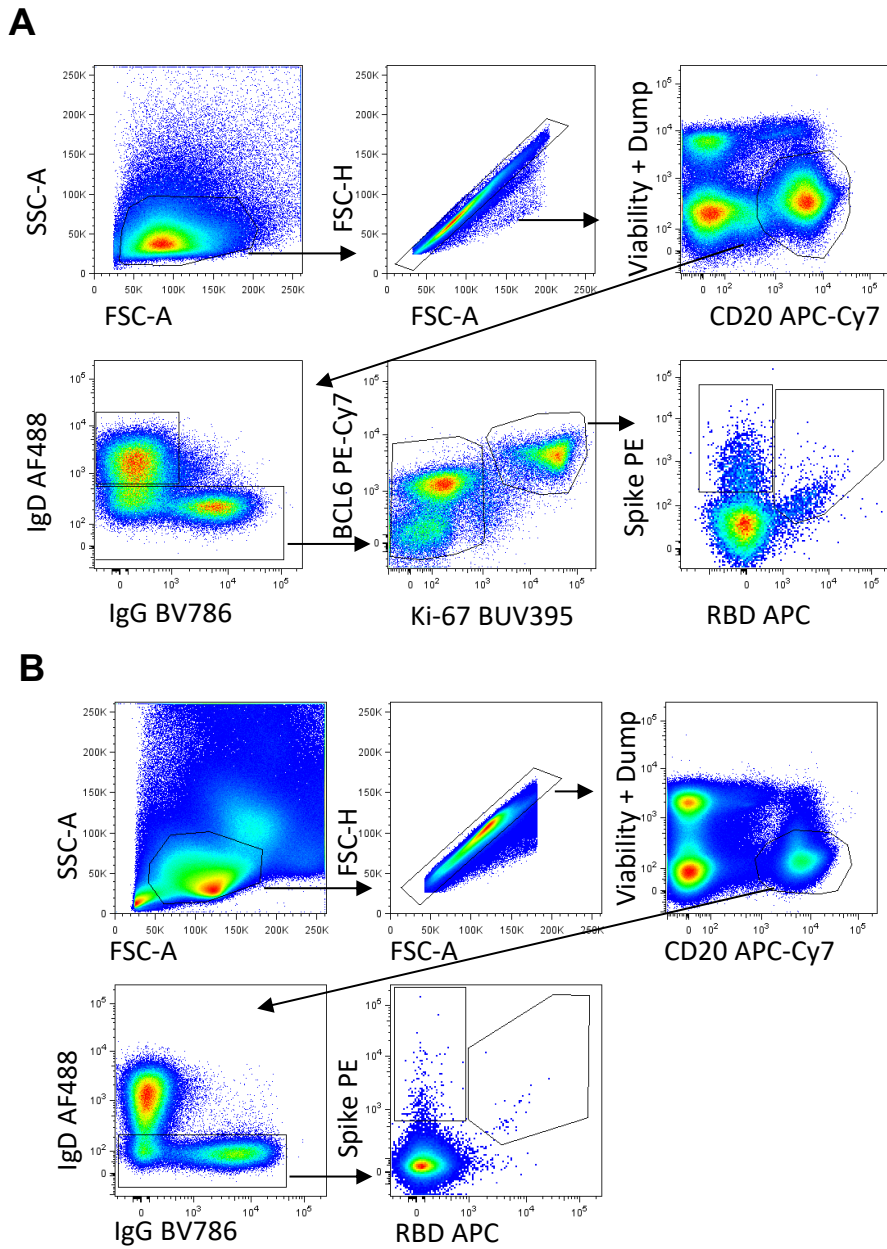

**Supplemental Figure 11. Macaque B cell gating strategy.** Gating of antigen-specific (A) germinal centre B cells in lymph nodes or (B) circulating memory B cells in PBMC samples. Lymphocytes were identified by FSC-A vs SSC-A gating, followed by doublet exclusion (FSC-A vs FSC-H), and gating on dump<sup>-</sup> (CD3<sup>-</sup>CD8<sup>-</sup>CD14<sup>-</sup>CD10<sup>-</sup>CD16<sup>-</sup>streptavidin<sup>-</sup>) live CD20<sup>+</sup> B cells. (A) Antigen-specific germinal center B cells were identified from class-switched IgD<sup>-</sup> B cells and intracellular expression of BCL6 and Ki-67. Alternatively, (B) circulating memory B cells in PBMC samples were identified as CD20<sup>+</sup>IgD<sup>-</sup>. Antigen specificity was determined by binding to SARS-CoV-2 spike (S) and/or SARS-CoV-2 RBD probes. Gating corresponds to data presented in Figure 3D-E.

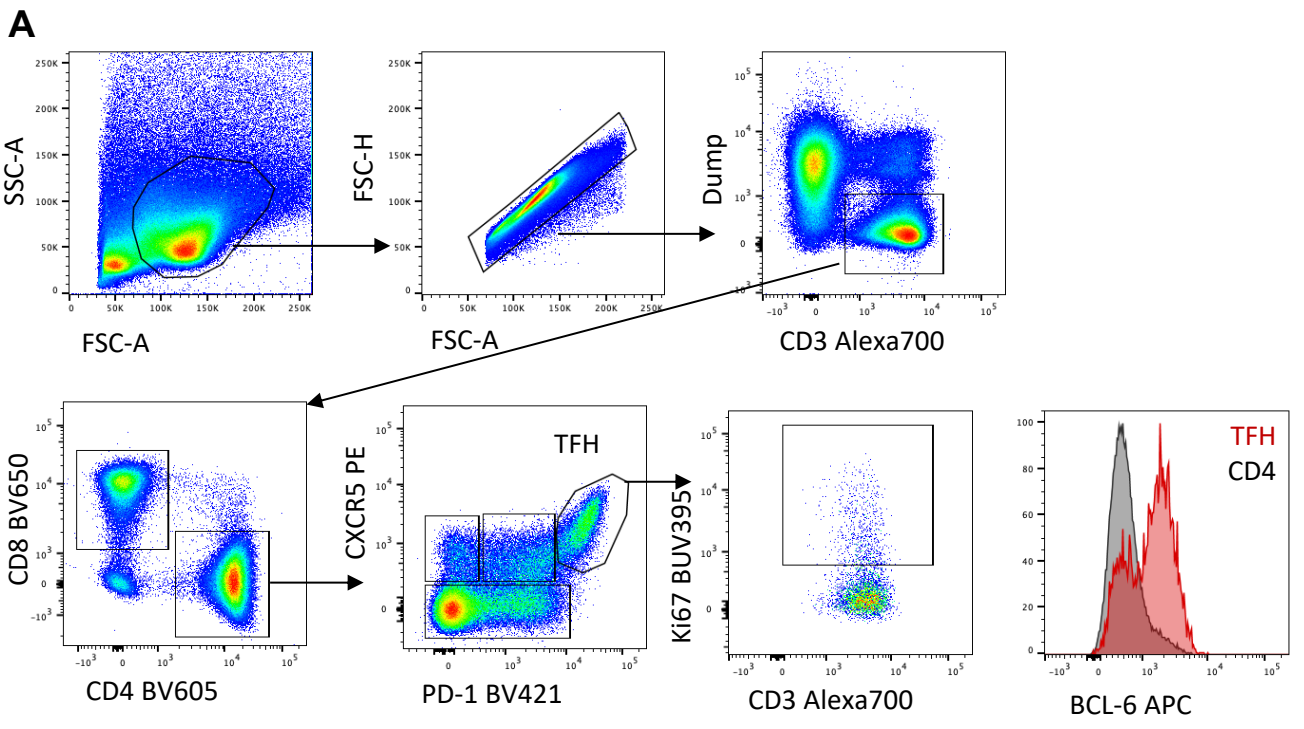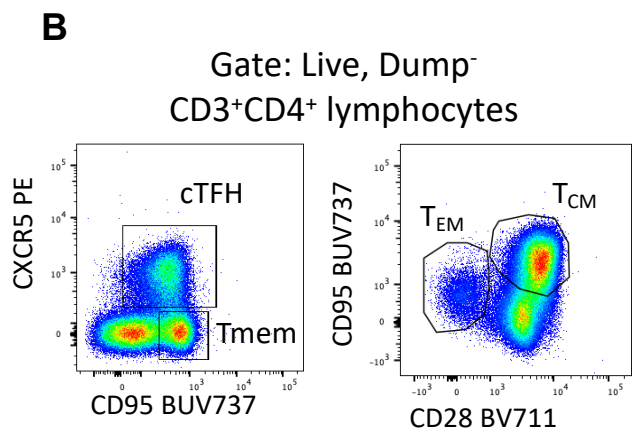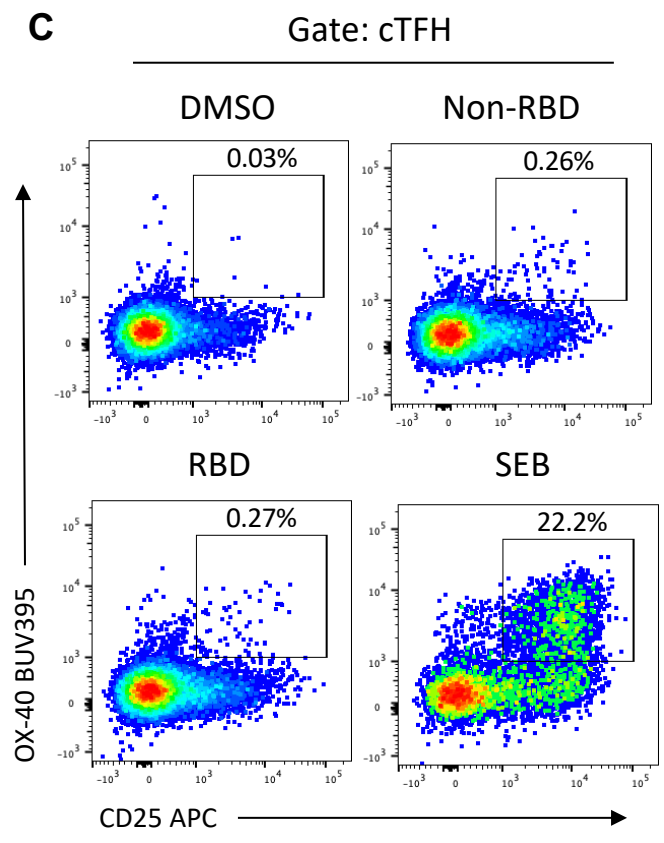

**Supplemental Figure 12. Macaque T cell gating strategy.** (A) Gating of lymph node GC TFH (CXCR5<sup>hi</sup>PD-1<sup>hi</sup>) cells, and expression of Ki-67 and BCL-6. (B) Ex vivo identification of macaque cTFH, T<sub>CM</sub> and T<sub>EM</sub> in PBMC. (C) Identification of OX-40<sup>+</sup>CD25<sup>+</sup> cTFH following in vitro peptide pool or SEB stimulation. Gating corresponds to data presented in Figure 3F-I.

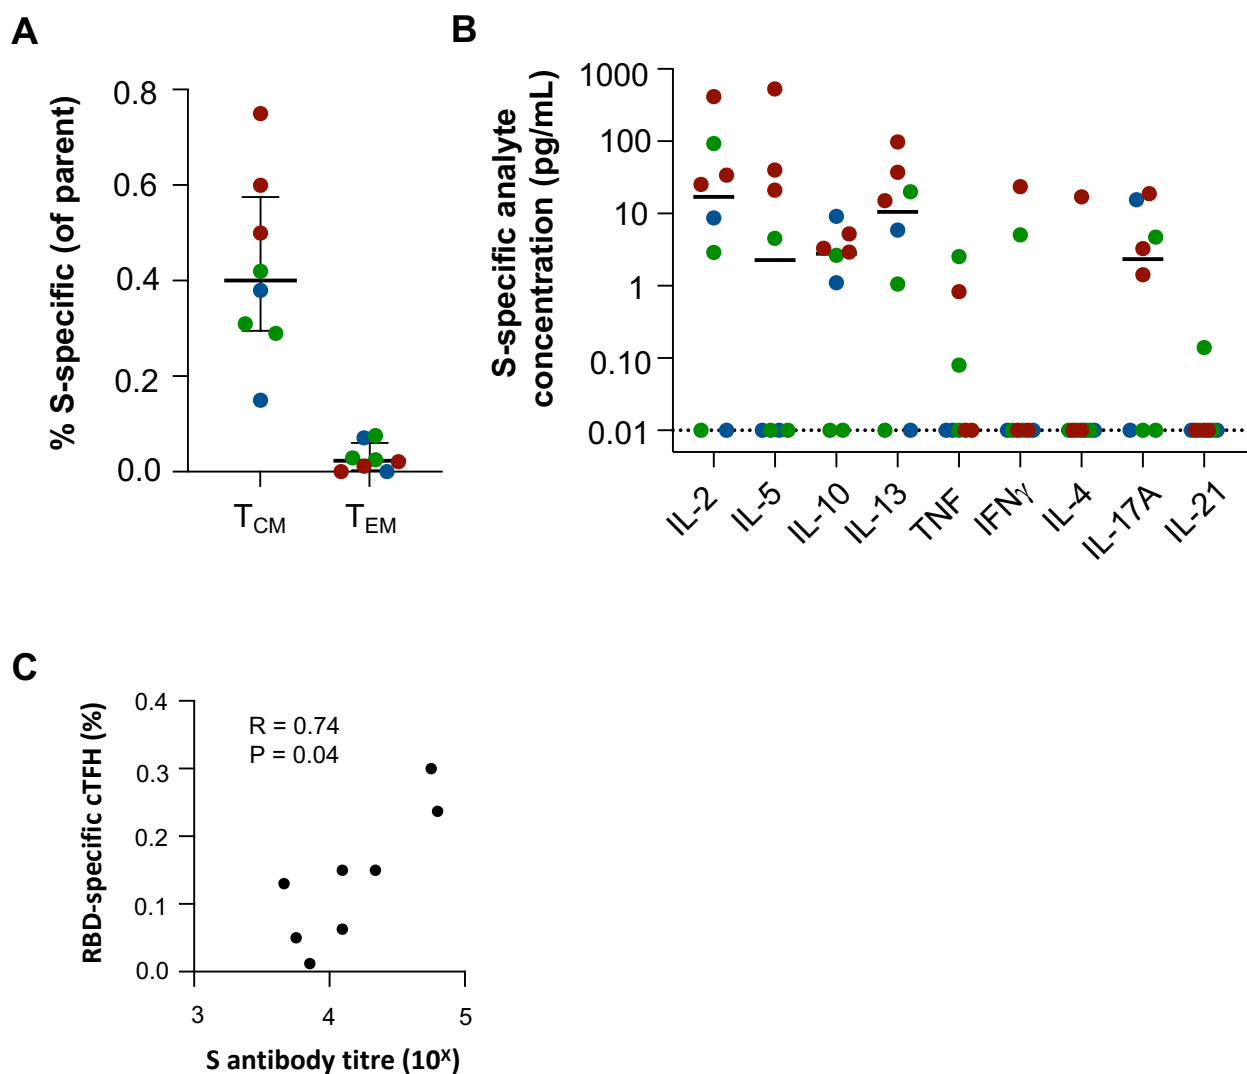

**Supplemental Figure 13. S-specific T cell memory and cytokine production from macaque PBMC.** (A) Quantification of total S-specific responses among T<sub>CM</sub> or T<sub>EM</sub> populations (n=8). Red, Spike/Spike group; green, Spike/RBD group; blue, RBD/RBD group. Data is presented as median  $\pm$  IQR. (B) Quantification of cell culture supernatant cytokine concentrations following 18 hour stimulation of PBMC with overlapping peptides covering S. Line indicates median. (C) Spearman correlation of RBD-specific cTFH frequency and S antibody titres at D41.

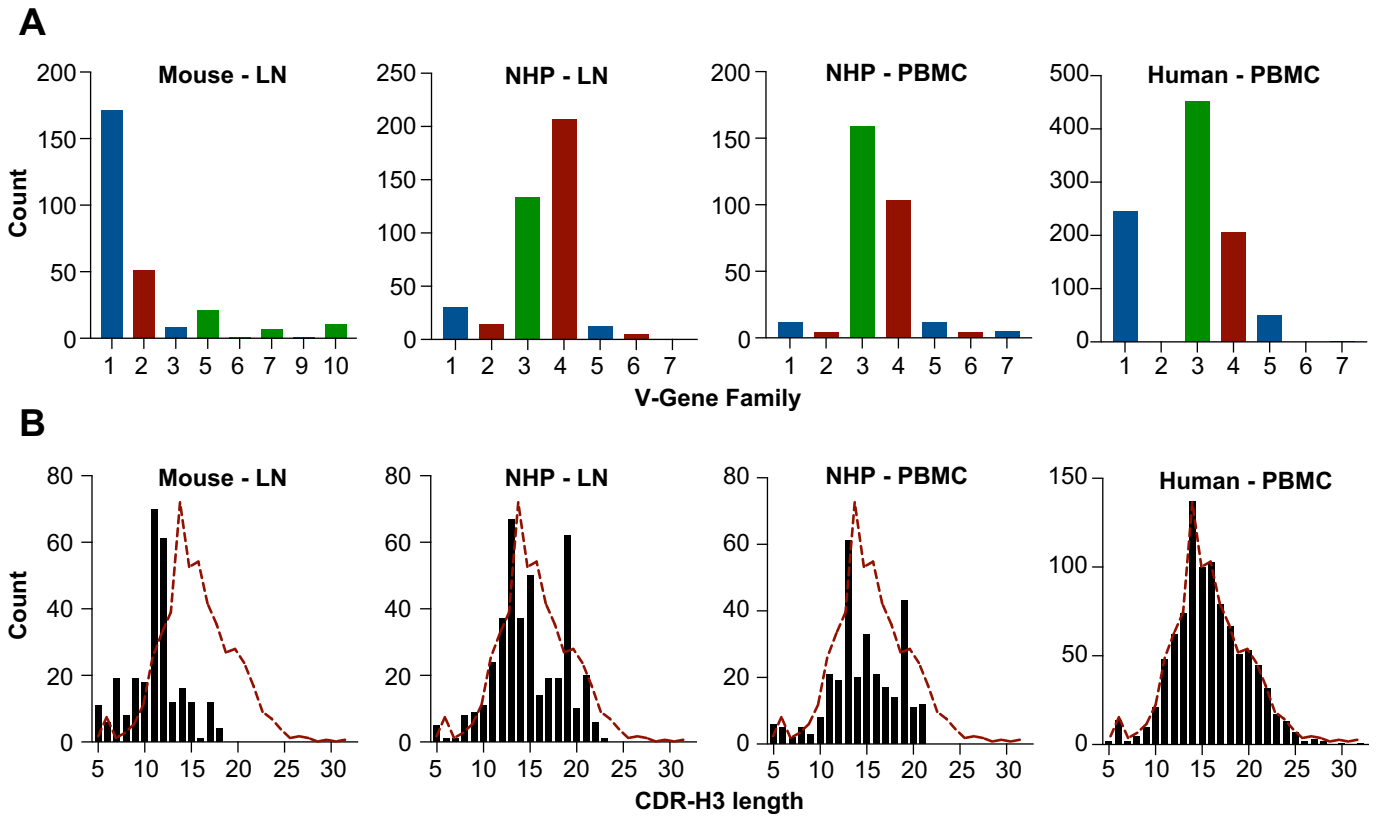

**Supplemental Figure 14.** (A) Distribution of V-gene family utilisation (colours indicate germline family) or (B) CDHR-H3 lengths of B cell receptor sequences recovered from: GC B cells (B220<sup>+</sup>IgD<sup>-</sup>GL7<sup>+</sup>) within the draining iliac LN of C57BL/6 mice (n=3) 14 days after immunisation with S; RBD- and S-specific B cells (CD20<sup>+</sup>IgD<sup>-</sup>IgG<sup>+</sup>) in the the draining iliac LN or PBMC of a single macaque 14 days after a second immunisation with S; or RBD- and S-specific B cells (CD19<sup>+</sup>IgD<sup>-</sup>IgG<sup>+</sup>) within PBMC of convalescent COVID-19 subjects (n=6; as reported in Juno et al., 2020)

## Mouse primers

| Name          | Sequence                        |
|---------------|---------------------------------|
| 1mFH_I        | AGGAACTGCAGGTGTCC               |
| 1mFH_II       | CAGCTACAGGTGCCACTCC             |
| 1mFH_III      | TGGCAGCARCAGCTACAGG             |
| 1mFH_IV       | CTGCCTGGTGACATCCCA              |
| 1mFH_V        | CCAAGCTGTGCCTGTCT               |
| 1mFH_VI       | TTTTAAAAGGTGTCCAGKGT            |
| 1mFH_VII      | CCTGTGTAACTRCAGGTGTCC           |
| 1mFH_VIII     | TTTTAAAAGGGGTCCAGTGT            |
| 1mFH_IX       | CGTTCCTGGTATCCTGTCT             |
| 1mFH_X        | ATGAAGTTGGYTRAACTGG             |
| 1mFH_XI       | TGTTGGGGCTKAAGTGGG              |
| 1mRG* (Gamma) | AGAAGGTGTGCACACCGCTGGAC         |
| 2mFG*         | GGGAATTCGAGGTGCAGCTGCAGGAGTCTGG |
| 2mRG* (Gamma) | GCTCAGGGAARTAGCCCTTGAC          |

## Non-human primate primers

| Name     | Sequence                |
|----------|-------------------------|
| RhH1-O   | ATGGACTKGACCTGGAGG      |
| RhH2-O   | ATGGACTTGACCTGGAAG      |
| RhH3-O   | ATGGACTGGACCTGGAG       |
| RhH4-O   | ATGGACACGCTTTGCTCC      |
| RhH5-O   | ATGGAGTTTGGGCTGAGC      |
| RhH6-O   | ATGGAGTTTGGACTGAGC      |
| RhH7-O   | ATGGAGTTGGGACTGAGC      |
| RhH8-O   | ATGGAGTCGTGGCTGAG       |
| RhH9-O   | ATGGAGTTGGGGCTGAG       |
| RhH10-O  | GGAAATTTAGGCTGAGCTG     |
| RhH11-O  | ATGGAATTTGGGCTGAGC      |
| RhH12-O  | GAAACACCTGTGGTCTT       |
| RhH13-O  | ATGAAGCACCTGTGGGTC      |
| RhH14-O  | ATGAAGCACCTGTGGTTC      |
| RhH15-O  | ATGGGGTCAACTGCCATC      |
| RhH16-O  | ATGGAGTTKGGGCTGAGC      |
| RhH17-O  | ATGGAGTTTKRCTGAGC       |
| RhH18-O  | ATGGAGTCRTGGCTGAGC      |
| RhH19-O  | ATGGAGTTTGTGCTGAGT      |
| RhH20-O  | ATGGGGTCCACCGTCAC       |
| RhH21-O  | ATGTCTGTCTCCTCCTC       |
| 3CgCH1   | GGAAGGTGTCACGCCGCTGGTC  |
| 3RhCgCH1 | AGGTGTGCACGCCGCTGG      |
| RhH1-I   | GCCCAGTCCCAGGTCCAG      |
| RhH2-I   | GTCTGTGCACAGGTGCAGCTG   |
| RhH3-I   | GCCCAGTCCCAGGTCCAG      |
| RhH4-I   | GTCCAGTCCCAGGTCCAGC     |
| RhH5-I   | GCCCAGTCCCAGGTCCAG      |
| RhH6-I   | GCCCAGTCCCAGGTCCAG      |
| RhH7-I   | CGCCACTCTGAGGTCCAG      |
| RhH8-I   | GGTGTCCAGTCCCAAGTCCAAC  |
| RhH9-I   | GGTCTGTCCCAGGTGCAG      |
| RhH10-I  | GGGTCTGTCCCAGGTGAAAG    |
| RhH11-I  | TGTCTGTGCACAGGTGCAGC    |
| RhH12-I  | GTCTGTCCCAGGTGCAGC      |
| RhH13-I  | GTCTGTCCCAGGTGCAGC      |
| RhH14-I  | GTCTGTCCCAGGTGCAGC      |
| RhH15-I  | GGGTCTGTCCCAGGTGCAG     |
| RhH16-I  | GGGTCTGTGCACAGGTGCAG    |
| RhH17-I  | GGGTCTGTGCACAGGTGCAG    |
| RhH18-I  | GGGTCTGTCCCAGGTGCAG     |
| RhH19-I  | GGGTAGTGTCCCAGGTGCAA    |
| RhH20-I  | GGCTGTCCCAGGTGCAG       |
| RhH21-I  | GGGTCTGTCCCAGGTGACC     |
| RhH22-I  | GGCTCTGTCCCAGGTGACC     |
| RhH23-I  | GGGTCTGTCCCAGGTGACC     |
| RhH24-I  | GGGTCTGTCCCAGGTACAG     |
| RhH25-I  | GGGTCTGTCCCAGGTACAAC    |
| RhH26-I  | GGTCTGTCCCAGGTGCAC      |
| RhH27-I  | GGTCTGTCCCAGGTGCAA      |
| RhH28-I  | GAGTCTGTGCCAGGTGCAG     |
| RhH29-I  | GGGTCCAGTGTGACGTGCAG    |
| RhH30-I  | GGGTCCAGTGTGAAGTGCAG    |
| RhH31-I  | GGGTCCAGTGTGAGGTGCAG    |
| RhH32-I  | GGGTCCAGTGTGAGGTGCAA    |
| RhH33-I  | GGGTCCAGTGTGAGATGCAGC   |
| RhH34-I  | GGGTCCAGTGTGAGGTGCA     |
| RhH35-I  | GGGTCCAGTGTGAGGTGCC     |
| RhH36-I  | GGGTCCAGTGTGAGGTGAAGTTG |
| RhH37-I  | GGGTCTGTCCCAGATGCAGC    |
| RhH38-I  | GGTCTGTCCCAGCTGCAG      |
| RhH39-I  | TCCCAGTGTGAGGTGCAGC     |
| 3IgInt   | GTTCCGGGAAGTAGTCCTTGAC  |

**Supplementary Table 1. Primers for B cell receptor heavy chain sequencing**
